# Supplementary material
Source: publisher figshare collection journal article supplement (https://karger.figshare.com/ndownloader/files/36506214)
Supplement: Supplementary file 1 [file 36506214]

Supplementary table 2: Comparison of G1 and G2 for Information processing speed, RCFT, DVT, and verbal fluency and Stroop test.

| Scores | G1= Normal hearing(N=75) | | | G2 =Normal hearing with tinnitus(N=75) | | | Z value | p-value |
| --- | --- | --- | --- | --- | --- | --- | --- | --- |
|  | Mean | S.D | Mean Rank | Mean | S.D | Mean Rank |  |  |
| **INFORMATION PROCESSING SPEED** | | | | | | | | |
| DSST | 256.85 | 101.92 | 77.41 | 252.58 | 106.84 | 73.59 | 0.539 | 0.59 |
| **VISUAL MEMORY(RCFT)** | | | | | | | | |
| RCFT -Copy | 33.18 | 4.17 | 71.87 | 33.85 | 2.96 | 79.13 | 1.05 | 0.29 |
| RCFT -Immediate | 20.60 | 7.08 | 75.55 | 20.80 | 6.64 | 75.45 | 0.013 | 0.98 |
| RCFT -Delayed | 20.22 | 7.12 | 76.37 | 20.19 | 7.15 | 74.63 | 0.245 | 0.80 |
| **VISUAL ATTENTION (DVT)** | | | | | | | | |
| DVT Time taken | 482.58 | 129.15 | 72.20 | 498.13 | 125.79 | 78.80 | 0.930 | 0.35 |
| DVT Omissions | 9.01 | 7.67 | 72.05 | 14.69 | 18.93 | 78.95 | 0.973 | 0.33 |
| **VERBAL FLUENCY** | | | | | | | | |
| COWA | 9.74 | 2.93 | 81.83 | 8.77 | 2.95 | 69.17 | 1.79 | 0.07 |
| Animal Names Test | 12.10 | 2.67 | 76.63 | 11.97 | 3.12 | 74.37 | 0.32 | 0.74 |
| **RESPONSE INHIBITION (STROOP TEST)** | | | | | | | |  |
| Word score | 88.06 | 18.02 | 80.03 | 86.65 | 13.97 | 70.97 | 1.28 | 0.20 |
| Color score | 60.76 | 14.75 | 77.27 | 59.93 | 11.96 | 73.73 | 0.499 | 0.61 |
| Stroop effect | 21.46 | 10.52 | 69.29 | 25.04 | 12.13 | 81.71 | 1.75 | 0.08 |
